# Supplementary material for: Evaluating LingualAI: A Prospective Validation of AI-Based Real- Time Translation Against Certified Human Interpreters
Source: Research Square preprint supplement (doi:10.21203/rs.3.rs-8205991/v1), 2025-12-05
Supplement: Supplementary file 1 [file 07184a4bc7273f8b361bedb5.docx]

**Scenarios 1-3 used for validation of LingualAI**

**Scenario 1: Post-Surgical Check-Up (Sinus Surgery)**

**Doctor:** Hi, it’s good to see you again. How have you been doing since the surgery?

**Patient:** Creo que estoy bien, pero mi nariz aún se siente hinchada y tengo algo de congestión. A veces me cuesta respirar por la nariz.

**Doctor:** That’s expected. The swelling should go down over the next few weeks. Are you still doing the Budesonide irrigations?

**Patient:** No, dejé de hacerlo la semana pasada.

**Doctor:** That might be why your symptoms are coming back. The irrigations help keep inflammation down. I’d like you to restart them twice a day.

**Patient:** Está bien. Además, siento algo de presión en la frente y a veces tambien siento que mis oídos están tapados.

**Doctor:** That could be from lingering inflammation in your sinuses. Let me take a look. Everything looks like it’s healing well. No signs of infection. But I do see some fluid behind your eardrums, which can happen when the sinuses are inflamed.

**Patient:** Entonces, ¿ese problema se resolverá solo?

**Doctor:** Usually, yes. If it doesn’t, we might need to try a nasal steroid spray to help open up the eustachian tubes. Let’s see how you feel over the next month.

**Patient:** Está bien.

**Doctor:** We’ll check on you again in six weeks. If anything worsens before then—like severe pain, bleeding, or fever, call us right away.

**Scenario 2: Medication and Side Effects**

**Doctor:** Are you still taking all your prescribed medications?

**Patient:** Creo que sí. Tomo uno por la mañana y otro por la noche.

**Doctor:** Let’s go over them. You’re on Losartan for blood pressure, Metformin for diabetes, and Budesonide for your nose. Are you taking all of them as directed?

**Patient:** Tomo Losartan cada mañana, pero dejé de tomar Metformina porque me hacía sentir mareado.

**Doctor:** When did you stop?

**Patient:** Hace dos semanas.

**Doctor:** That could be why your blood sugar is higher. Metformin doesn’t usually cause dizziness. Have you been checking your blood sugar levels?

**Patient:** No, no tengo un monitor.

**Doctor:** I’ll arrange for you to get one. Also, stopping Metformin suddenly can cause issues. Let’s start it again, but we’ll lower the dose to see if that helps.

**Patient:** Está bien. Además, me siento con mucha sed todo el tiempo.

**Doctor:** That’s another sign your blood sugar might be too high. We’ll run a blood test today to check your levels.

**Scenario 3: Emergency Room Visit – Chest Pain**

**Doctor:** What brought you to the ER today?

**Patient:** Esta mañana empecé a sentir dolor en el pecho. Se siente como una fuerte presión.

**Doctor:** Does the pain spread to your arm, neck, or jaw?

**Patient:** Mi brazo izquierdo se siente un poco entumecido.

**Doctor:** Are you short of breath? Feeling nauseous or sweaty?

**Patient:** Sí, empecé a sudar mucho y me siento un poco mareado.

**Doctor:** This could be a heart issue. We’re going to do an EKG and blood tests right away. Have you had chest pain like this before?

**Patient:** No, nunca.

**Doctor:** Do you have a history of high blood pressure, diabetes, or heart disease?

**Patient:** Tengo presión alta, pero no siempre me tomo mi medicación.

**Doctor:** That might be contributing. Let’s get these tests done quickly. If it is a heart attack, we need to act fast.
