# Supplementary material for: Evaluating LingualAI: A Prospective Validation of AI-Based Real- Time Translation Against Certified Human Interpreters
Source: Research Square preprint supplement (doi:10.21203/rs.3.rs-8205991/v1), 2025-12-05
Supplement: Supplementary file 2 [file 17e47e5ed0b475cb22341443.docx]

**Translation Latency and Estimated cost per 10-minute conversation**

Based on internal analytics from the LingualAI system, the average end-to-end translation latency—including speech-to-text (STT), real-time partial translation, transcription verification and correction, and final sentence-level translation is 9.72 seconds per message. This reflects the average duration from the start of a spoken sentence to the playback of its translated audio (text-to-speech output) in the target language. The latency is sufficiently low to support effective turn-based conversations in clinical settings.

Cost Estimate for a 10-Minute Medical Conversation

To contextualize the economic impact, we compared the estimated cost of a 10-minute bilingual clinical conversation using LingualAI against conventional interpreter services.

1. LingualAI (AI-based pipeline)

• Average words per message: 14.45

• Messages per 10-minute session (based on 9.72s average duration): approximately 61.7 messages

• Total words per session: 14.45 × 61.7 ≈ 891 words

Translation API usage per 10-minute session (OpenAI GPT-4o-mini)

• Real-time partial translations: ~154 calls

(Assuming an average of 2.5 translation calls per message during STT partial updates)

• Final sentence-level translation: 61.7 calls

• STT verification and correction (post-STT): 61.7 calls

• Total estimated OpenAI API calls: 277.4 (rounded to 278 requests)

Cost Calculation (GPT-4o-mini model)

• OpenAI pricing: $0.15 per 1 million input tokens

• Estimated tokens per translation call: 25 tokens (based on ~18–22 words per message)

• Total input tokens per session: 278 × 25 = 6,950 tokens

• Translation cost: (6,950 ÷ 1,000,000) × $0.15 ≈ $0.0010425 USD

Infrastructure Cost (AWS Services)

Based on AWS billing data for S3, Lambda, API Gateway, DynamoDB, and Cognito used through AWS Amplify:

• Total AWS cost for 3,456 sessions ≈ $92 USD

• Average cost per session ≈ $0.027 USD

• Rounded estimate for infrastructure cost per 10-minute conversation ≈ $0.03 USD

Total Estimated Cost Using LingualAI

• Translation API (OpenAI): ≈ $0.001

• Infrastructure (AWS): ≈ $0.03

• Total: approximately $0.03–$0.04 USD per 10-minute conversation

⸻

2. Human Interpreter (Phone / Video Interpretation)

Based on enterprise invoices from June 2025:

• Phone Interpretation (Language Line Services):

• 508 minutes → $350.52 → $0.69 per minute

• Video Interpretation (Insight):

• 1,221 minutes → $1,288.76 → $1.06 per minute

Estimated Interpreter Cost per 10-Minute Session

• Phone Interpreter: $6.90

• Video Interpreter: $10.60

⸻

Conclusion: Practical Trade-Off

LingualAI achieves sub-10-second translation latency per sentence, enabling efficient turn-based communication in clinical settings. Compared to traditional phone or video interpretation services, the cost of a 10-minute medical conversation is reduced from $6.90–$10.60 to just $0.03–$0.04, a greater than 99.5% reduction. This demonstrates the scalability and cost-effectiveness of AI-driven translation, especially for high-demand or resource-limited healthcare environments.
