# Supplementary material for: Evaluating LingualAI: A Prospective Validation of AI-Based Real- Time Translation Against Certified Human Interpreters
Source: Research Square preprint supplement (doi:10.21203/rs.3.rs-8205991/v1), 2025-12-05
Supplement: Supplementary file 3 [file 381911405006de8f13ad08af.docx]

**A-priori power calculation**

=== A Priori Non-Inferiority Power (with clustering) ===

“Given our design and expected variability, do we have enough statistical power (≥80%) to detect that LingualAI is not worse than human translators by more than Δ = 0.30 points?”

Inputs: N_LINES=33, MEAN_RATERS=7.0, ICC=0.25

DELTA=0.30, MU_TRUE=0.10, SD_DIFF=0.60, ALPHA=0.025

Effective sample size (n_eff): 92.40

One-sided NI power: 89.3%

Sensitivity (power %) across ICC and SD assumptions:

ICC | SD | n_eff | Power%

------------------------------------

0.20 | 0.60 | 105.0 | 92.7

0.20 | 0.65 | 105.0 | 88.4

0.20 | 0.70 | 105.0 | 83.3

0.25 | 0.60 | 92.4 | 89.3

0.25 | 0.65 | 92.4 | 84.1

0.25 | 0.70 | 92.4 | 78.4

0.30 | 0.60 | 82.5 | 85.7

0.30 | 0.65 | 82.5 | 79.8

0.30 | 0.70 | 82.5 | 73.7

Using a one-sided non-inferiority test (α=0.025), Δ=0.30, σ_d=0.60, expected μ_d=0.10, and clustering adjustment with mean 7 raters/line and ICC=0.25 (n_eff≈92), the projected power was 89%.

Python Code:

# Non-inferiority a priori power calculator with clustering (no external deps)

# ---------------------------------------------------------------------------

# This script computes:

# 1) Effective sample size after clustering by line/items (design effect)

# 2) One-sided non-inferiority power using a normal approximation

# 3) A small sensitivity table across plausible ICC and SD values

# 4) A ready-to-paste Methods sentence

#

# Assumptions (edit the PARAMETERS block below to fit your study):

# - Non-inferiority margin Δ on a 5-point Likert scale

# - Expected true mean difference μ_d (human - AI), positive favors humans

# - SD of paired differences σ_d (often ~0.6–0.7 for Likert domain deltas)

# - Raters are clustered within items (lines), accounted via ICC and design effect

#

# No SciPy required. Uses a z-alpha lookup for alpha ∈ {0.05, 0.025, 0.01}.

from math import sqrt, erf

# -------------------- PARAMETERS --------------------

N_LINES = 33 # Total items/lines

MEAN_RATERS = 7.0 # Average raters per line

ICC = 0.25 # Intraclass correlation among raters on the same line

DELTA = 0.30 # Non-inferiority margin Δ (points on a 5-point scale)

MU_TRUE = 0.10 # Expected true mean difference (human - AI)

SD_DIFF = 0.60 # SD of paired differences σ_d

ALPHA = 0.025 # One-sided alpha (use 0.025 for 95% NI CI)

ICC_GRID = [0.20, 0.25, 0.30]

SD_GRID = [0.60, 0.65, 0.70]

# ----------------------------------------------------------------

# Normal CDF via error function

def Phi(z: float) -> float:

return 0.5 * (1.0 + erf(z / sqrt(2.0)))

# Common z-quantiles for one-sided alpha

Z_ALPHA_LOOKUP = {

0.05: -1.6448536269514722,

0.025: -1.959963984540054,

0.01: -2.3263478740408408,

}

def z_alpha(alpha: float) -> float:

if alpha in Z_ALPHA_LOOKUP:

return Z_ALPHA_LOOKUP[alpha]

# Fallback: simple linear interpolation between nearby keys (coarse but fine for planning)

keys = sorted(Z_ALPHA_LOOKUP.keys())

if alpha <= keys[0]:

return Z_ALPHA_LOOKUP[keys[0]]

if alpha >= keys[-1]:

return Z_ALPHA_LOOKUP[keys[-1]]

# interpolate

for i in range(len(keys)-1):

if keys[i] <= alpha <= keys[i+1]:

a0, a1 = keys[i], keys[i+1]

z0, z1 = Z_ALPHA_LOOKUP[a0], Z_ALPHA_LOOKUP[a1]

t = (alpha - a0) / (a1 - a0)

return z0 + t * (z1 - z0)

def effective_n(n_items: int, mean_raters_per_item: float, icc: float) -> float:

"""

Design effect for cluster (item)-level clustering with m raters per item and ICC=icc.

n_eff = (n_items * m) / (1 + (m - 1) * ICC)

"""

m = mean_raters_per_item

deff = 1.0 + (m - 1.0) * icc

return (n_items * m) / deff

def power_noninferiority(delta: float, # NI margin Δ

mu_true: float, # expected true mean difference μ_d (human - AI)

sd_diff: float, # SD of paired differences

n_eff: float, # effective sample size after clustering

alpha: float = 0.025):

"""

One-sided NI power using normal approximation.

Reject H0 if T < z_alpha, where T ~ N( (μ_d - Δ)/(σ/√n_eff), 1 ).

Power = Φ( z_alpha - (μ_d - Δ)/(σ/√n_eff) )

"""

za = z_alpha(alpha)

ncp = (mu_true - delta) / (sd_diff / sqrt(n_eff))

return Phi(za - ncp)

def methods_sentence(n_lines, mean_raters, icc, delta, mu_true, sd_diff, alpha):

n_eff = effective_n(n_lines, mean_raters, icc)

pw = power_noninferiority(delta, mu_true, sd_diff, n_eff, alpha)

return (

f"Using a one-sided non-inferiority test (α={alpha:.3f}), Δ={delta:.2f}, "

f"σ_d={sd_diff:.2f}, expected μ_d={mu_true:.2f}, and clustering adjustment "

f"with mean {mean_raters:.0f} raters/line and ICC={icc:.2f} (n_eff≈{n_eff:.0f}), "

f"the projected power was {pw*100:.0f}%."

)

# ---- Compute baseline estimates ----

n_eff_base = effective_n(N_LINES, MEAN_RATERS, ICC)

power_base = power_noninferiority(DELTA, MU_TRUE, SD_DIFF, n_eff_base, ALPHA)

sentence = methods_sentence(N_LINES, MEAN_RATERS, ICC, DELTA, MU_TRUE, SD_DIFF, ALPHA)

print("=== A Priori Non-Inferiority Power (with clustering) ===\n")

print(f"Inputs: N_LINES={N_LINES}, MEAN_RATERS={MEAN_RATERS}, ICC={ICC:.2f}")

print(f" DELTA={DELTA:.2f}, MU_TRUE={MU_TRUE:.2f}, SD_DIFF={SD_DIFF:.2f}, ALPHA={ALPHA:.3f}\n")

print(f"Effective sample size (n_eff): {n_eff_base:.2f}")

print(f"One-sided NI power: {power_base*100:.1f}%\n")

# ---- Sensitivity grid ----

print("Sensitivity (power %) across ICC and SD assumptions:")

print(" ICC | SD | n_eff | Power% ")

print("------------------------------------")

for icc in ICC_GRID:

n_eff_g = effective_n(N_LINES, MEAN_RATERS, icc)

for sd in SD_GRID:

p = power_noninferiority(DELTA, MU_TRUE, sd, n_eff_g, ALPHA)

print(f" {icc:0.2f} | {sd:0.2f} | {n_eff_g:6.1f} | {p*100:6.1f}")

# ---- Suggested Methods sentence ----

print("\nSuggested Methods sentence:")

print(sentence)
