# Supplementary material for: Evaluating LingualAI: A Prospective Validation of AI-Based Real- Time Translation Against Certified Human Interpreters
Source: Research Square preprint supplement (doi:10.21203/rs.3.rs-8205991/v1), 2025-12-05
Supplement: Supplementary file 4 [file 57f0e22915cc5453d61d0f00.docx]

**Error Analysis**

**Scenario 1:**

- P2 Doctor:
  - Audio:<https://drive.google.com/file/d/1mYwU7woeLh2gtEjdeKULzEnv-H6Fgsvc/view>
  - Transcription: “That’s expected. The swelling should go down over the next few weeks. Are you still doing the Budesonide irrigations?”
  - Translation: Eso es normal; la hinchazón debería disminuir en las próximas semanas. ¿Todavía estás haciendo las irrigaciones de budesonida?
  - Errors: fluency/prosody
- P6 Doctor:
  - <https://drive.google.com/file/d/1rVKtMuqlX6AcbgqYiNLKZV4N9HrzcUXm/view>
  - Transcription: “We’ll check on you again in six weeks. If anything worsens before then— like severe pain, bleeding, or fever, call us right away.”
  - Translation: “Te revisaremos nuevamente en seis semanas. Si algo empeora antes de eso, como dolor severo, sangrado o fiebre, llámanos de inmediato.”
  - Errors: fluency/prosody

**Scenario 2:**

- P2 Doctor:
  - <https://drive.google.com/file/d/1mJQVjuWFztOxaT55Cv_DNuubmcJnvSoC/view>
  - Transcription: “Let’s go over them. You’re on Losartan for blood pressure, Metformin for diabetes, and Budesonide for your nose. Are you taking all of them as directed?”
  - Translation: “Vamos a revisarlos. Estás tomando losartán para la presión arterial, metformina para la diabetes y budesonida para la nariz. ¿Estás tomando todos ellos como se te indicó?”
  - Errors: fluency/prosody
- P5 Patient:
  - <https://drive.google.com/file/d/14zvm37OCqJchT_AHlOM6ywxiGdr_L_Nw/view>
  - Transcription: “Está bien. Además, me siento con mucha sed todo el tiempo.”
  - Translation: “It's okay; besides, I feel very thirsty all the time.”
  - Errors: fluency/prosody

**Scenario 3:**

- P1 Doctor:
  - <https://drive.google.com/file/d/1Ynpm4kQbZllQ_QpeGpzUrZWq4GQRjP8z/view>
  - Transcription: "What brought you to the ER today?”
  - Translation: “¿Qué lo trajo a la sala de emergencias hoy?”
  - Errors: fluency/prosody
- P1 Patient:
  - <https://drive.google.com/file/d/1NLVgqtNytZt1nfDrzNGHLMMkEYGriTyN/view>
  - Transcription: “Esta mañana empecé a sentir dolor en el pecho. Se siente como una fuerte presión.”
  - Translation: “This morning I started to feel pain in my chest; it feels like a strong pressure.”
  - Errors: fluency/prosody
