# Supplementary material for: Evaluating LingualAI: A Prospective Validation of AI-Based Real- Time Translation Against Certified Human Interpreters
Source: Research Square preprint supplement (doi:10.21203/rs.3.rs-8205991/v1), 2025-12-05
Supplement: Supplementary file 5 [file 5ecee4fb126807986be52cf7.docx]

| **factor** | **n** | **mean_diff (human–app)** | **lower 95% CI (one-sided)** | **upper 95% CI (one-sided)** | **margin** | **non_inferior** | **t_stat_noninf** | **p_noninferiority** | **t_stat_paired** | **p_paired_two_sided** |
| --- | --- | --- | --- | --- | --- | --- | --- | --- | --- | --- |
| adequacy_accuracy_of_meaning | 30 | 0.141111 | 0.027424 | 0.254798 | 0.2 | FALSE | -0.880131 | 0.193012 | 2.108994 | 0.043698 |
| completeness | 30 | 0.18 | 0.058326 | 0.301674 | 0.2 | FALSE | -0.279291 | 0.391002 | 2.513621 | 0.017757 |
| confidence_for_clinical_use | 30 | 0.721111 | 0.435312 | 1.00691 | 0.2 | FALSE | 3.098099 | 0.997851 | 4.287135 | 0.000183 |
| cultural_contextual_appropriateness | 30 | 0.463333 | 0.159501 | 0.767165 | 0.2 | FALSE | 1.472645 | 0.924191 | 2.59111 | 0.014821 |
| fluency_naturalness | 30 | 1.181111 | 0.744001 | 1.618221 | 0.2 | FALSE | 3.813757 | 0.999669 | 4.591193 | 0.000079 |
| grammar_syntax | 30 | 0.218889 | 0.072886 | 0.364891 | 0.2 | FALSE | 0.219822 | 0.586225 | 2.547354 | 0.016418 |
| intelligibility_clarity_of_speech | 30 | 0.584444 | 0.324505 | 0.844384 | 0.2 | FALSE | 2.512968 | 0.991108 | 3.820292 | 0.00065 |
| overall_quality | 30 | 0.662222 | 0.385305 | 0.93914 | 0.2 | FALSE | 2.836132 | 0.99588 | 4.063305 | 0.000337 |
| pacing_speed_rhythm | 30 | 0.472222 | 0.297768 | 0.646676 | 0.2 | FALSE | 2.651355 | 0.993572 | 4.599289 | 0.000077 |
| prosody_tone | 30 | 0.722222 | 0.462274 | 0.98217 | 0.2 | FALSE | 3.413457 | 0.999044 | 4.720739 | 0.000055 |
| terminology_accuracy | 30 | 0.053333 | -0.067916 | 0.174583 | 0.2 | TRUE | -2.055315 | 0.024476 | 0.747387 | 0.460848 |
| vocabulary_general_language_use | 30 | 0.182222 | 0.022056 | 0.342388 | 0.2 | FALSE | -0.188596 | 0.425861 | 1.93311 | 0.063039 |

Margin = 0.2 and included scenarios - 1 and 2 (scenario 3 excluded).
