# Supplementary material for: Evaluating LingualAI: A Prospective Validation of AI-Based Real- Time Translation Against Certified Human Interpreters
Source: Research Square preprint supplement (doi:10.21203/rs.3.rs-8205991/v1), 2025-12-05
Supplement: Supplementary file 6 [file 95ee1a4192dd3e1c92847d2e.docx]

**Rating Instrument**

***Home Page of the Google Form for each scenario:***

Welcome to the LingualAI Evaluation Study.

Thank you for participating in this study.

This questionnaire is designed to capture your preferences regarding translations that enable a bilingual (English and Spanish) conversation between a patient and a clinician. The conversation consists of a few paragraphs (reflecting a two-way exchange: questions/statements and responses).

You will first hear the original conversation between the doctor and the patient, followed by two separate translations—one generated by AI and one by a certified, experienced translator. To maintain impartiality, we have not labelled which translation is which. We kindly ask that you set aside any pre-existing opinions you may have about the general capabilities of AI or human translators.

For each translation, you will evaluate it based on 12 parameters, which are detailed on each page. Please note that all your responses are completely anonymous, and no identifying information will be linked to your feedback.

Project Team

Leadership

Project ideation: Dr. Xiaoqian Jiang

Project facilitation: Dr. Babatope O Fatuyi

End-to-End App development: Carlos A Jaimes Garcia

UI/UX expert: Cecilia Wang

Evaluation Coordinator: Uday Pratap Singh

Contacts: Jingqi.Wang.1@uth.tmc.edu, uday.pratapsingh@uth.tmc.edu

Thank you again for your participation and valuable feedback.

—-

Line 01 (Clinician) - Original Statement

🎧 Listen the original audio spoken by the Clinician during the consultation: Drive Link

Line 01 (Clinician) - Translation A

Listen to Translation A: Drive Link

Please evaluate this translation based on the original speaker’s intent and clarity.

Score 1 (very poor) through 5 (Excellent) for the following:

- Adequacy (Accuracy of Meaning): Does the audio rendition fully and faithfully convey the meaning of the source message, without omissions or additions?
- Terminology Accuracy: Are specialized clinical and medical terms (e.g., drug names, procedures, diagnoses) correctly and precisely translated?
- Fluency / Naturalness: Does the phrasing sound smooth, natural, and native-like in the target language, avoiding awkward or literal constructions?
- Intelligibility (Clarity of Speech): Is every word easy to hear and understand due to proper pronunciation and clear audio quality?
- Prosody & Tone: Is the intonation, rhythm, and tone of voice appropriate for a professional clinical setting?
- Pacing (Speed & Rhythm): Is the speaking rate comfortable to follow: not too fast, not too slow, for a clinical listener?
- Completeness: Does the audio include all critical information from the original, without introducing unnecessary content?
- Cultural & Contextual Appropriateness: Are cultural references, idioms, and phrasing adapted appropriately for the patient’s background and clinical context?
- Grammar & Syntax: Is the audio grammatically correct, with proper sentence structure and word order in the target language?
- Vocabulary (General Language Use): Are common, appropriate, and consistent words chosen across the message (not overly technical or simplistic)?
- Overall Quality: Overall, how would you rate this audio as a clinical communication tool?
- Confidence for Clinical Use: If this translation were used in a real clinical interaction, how confident would you feel relying on it?

Line 01 (Clinician) - Translation B

Listen to Translation B: Drive Link

Please evaluate this translation based on the original speaker’s intent and clarity.

Score 1 (very poor) through 5 (Excellent) for the following:

- Adequacy (Accuracy of Meaning): Does the audio rendition fully and faithfully convey the meaning of the source message, without omissions or additions?
- Terminology Accuracy: Are specialized clinical and medical terms (e.g., drug names, procedures, diagnoses) correctly and precisely translated?
- Fluency / Naturalness: Does the phrasing sound smooth, natural, and native-like in the target language, avoiding awkward or literal constructions?
- Intelligibility (Clarity of Speech): Is every word easy to hear and understand due to proper pronunciation and clear audio quality?
- Prosody & Tone: Is the intonation, rhythm, and tone of voice appropriate for a professional clinical setting?
- Pacing (Speed & Rhythm): Is the speaking rate comfortable to follow: not too fast, not too slow, for a clinical listener?
- Completeness: Does the audio include all critical information from the original, without introducing unnecessary content?
- Cultural & Contextual Appropriateness: Are cultural references, idioms, and phrasing adapted appropriately for the patient’s background and clinical context?
- Grammar & Syntax: Is the audio grammatically correct, with proper sentence structure and word order in the target language?
- Vocabulary (General Language Use): Are common, appropriate, and consistent words chosen across the message (not overly technical or simplistic)?
- Overall Quality: Overall, how would you rate this audio as a clinical communication tool?
- Confidence for Clinical Use: If this translation were used in a real clinical interaction, how confident would you feel relying on it?

Similarly for each line, 1. Original Statement, then Translation A (Certified human translator or LingualAI) followed by Translation B (Certified human translator or LingualAI)
