# Supplementary figures and images for: Evaluating LingualAI: A Prospective Validation of AI-Based Real- Time Translation Against Certified Human Interpreters
Source: Research Square preprint supplement (doi:10.21203/rs.3.rs-8205991/v1), 2025-12-05

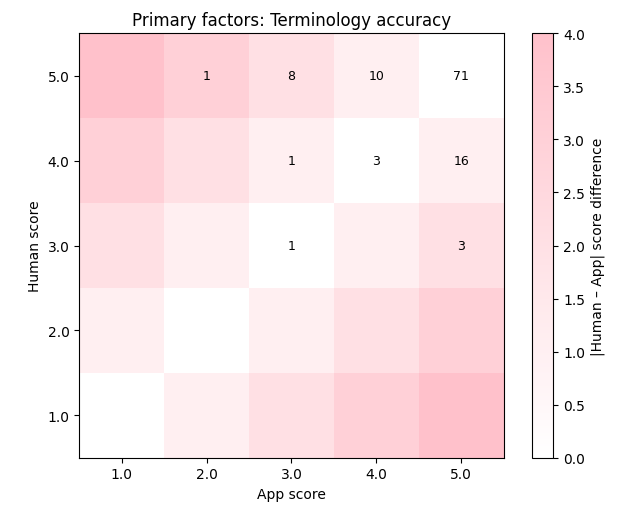

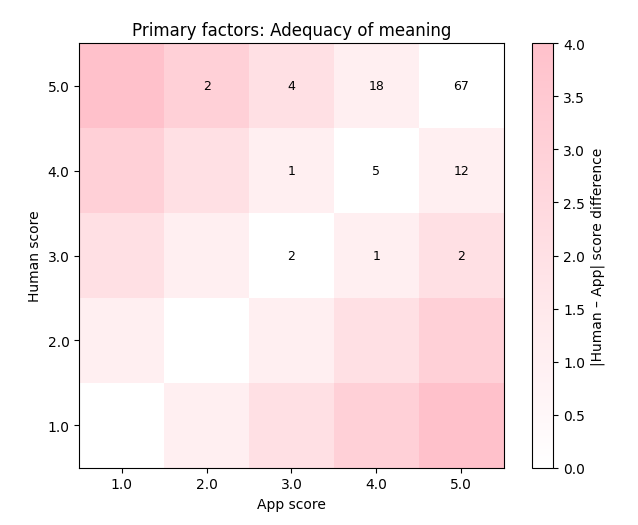


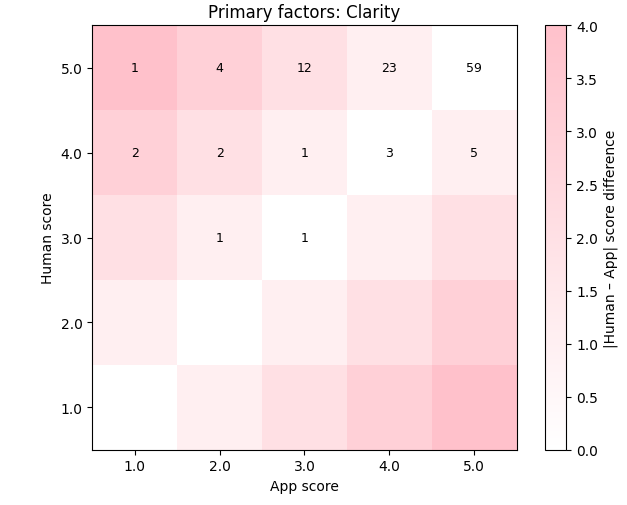


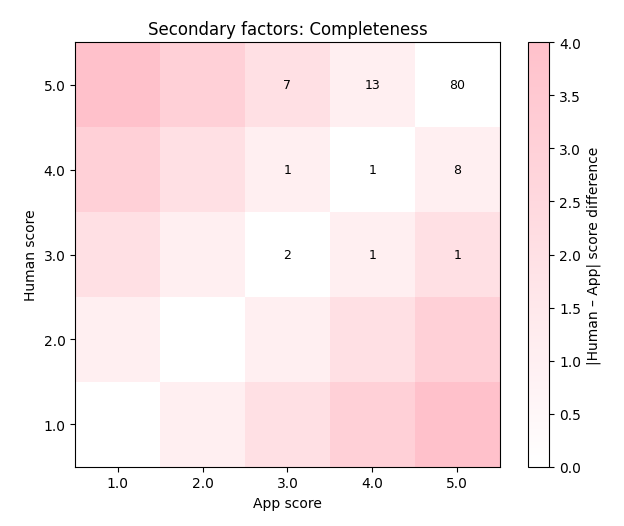


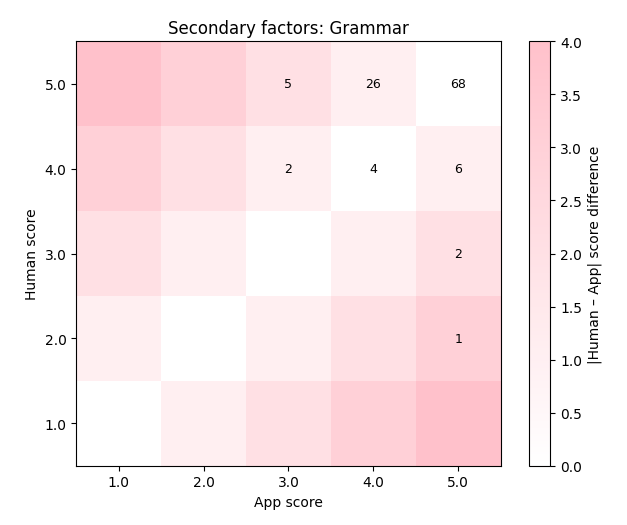


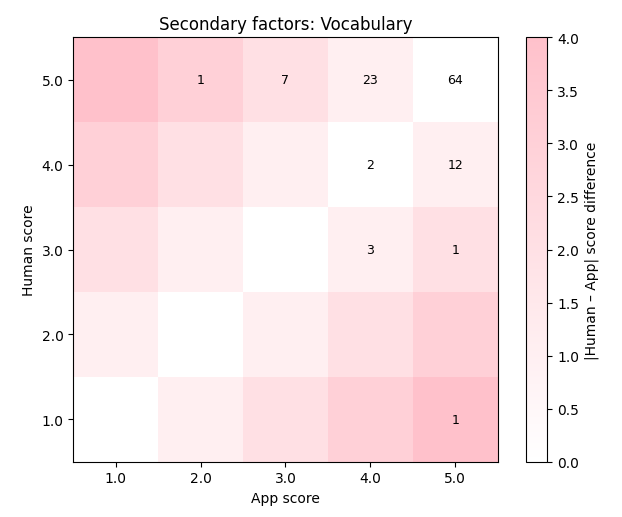


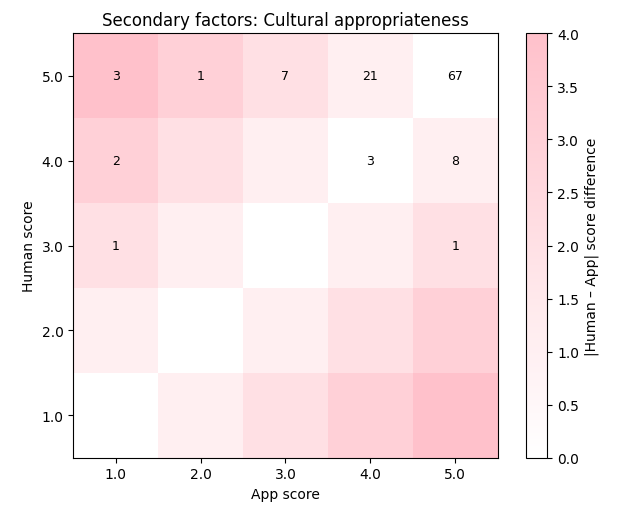


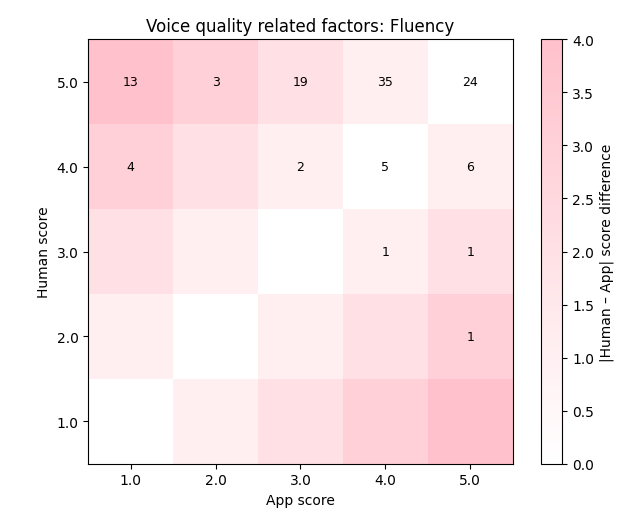


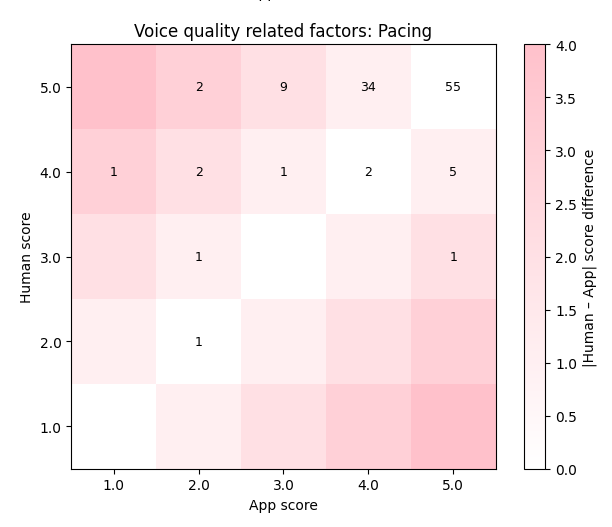


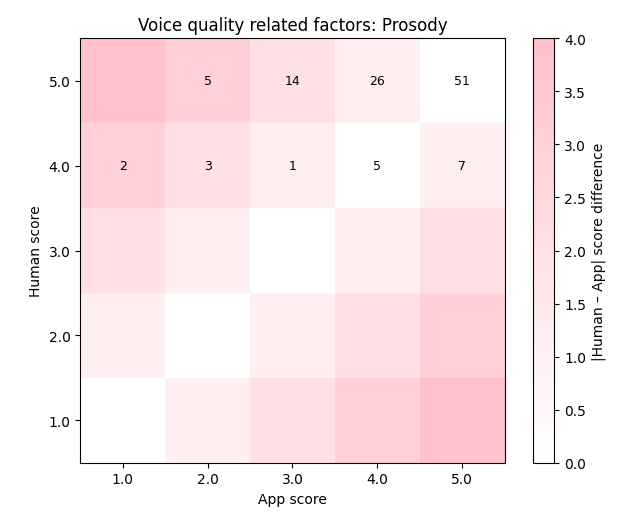


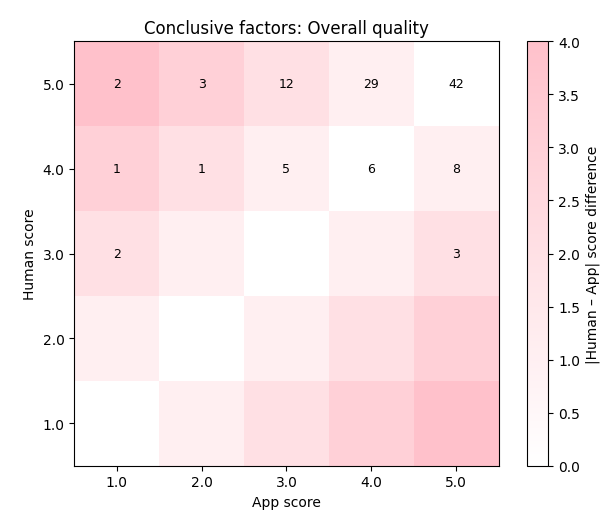


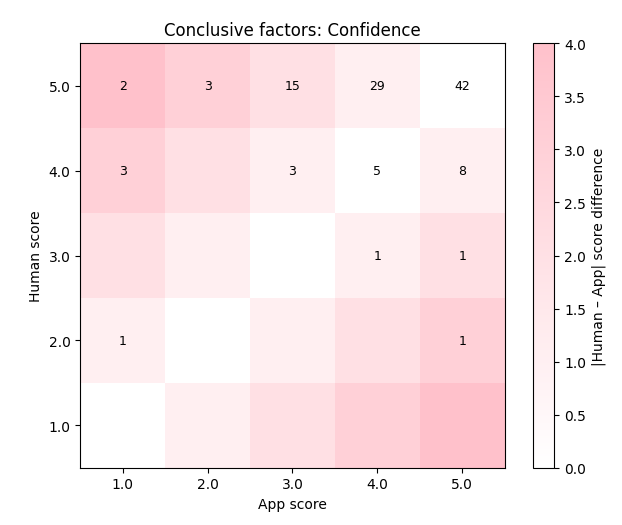

Supplement: Supplementary file 7 [file a2d2d70feec315c791fa1ac6.docx]
